# Supplementary material for: A New Approach to the Synthesis of Nanocrystalline Cobalt Boride in the Course of the Thermal Decomposition of Cobalt Complexes [Co(DMF)6]2+ with Boron Cluster Anions
Source: MDPI journal article supplement (doi:10.3390/molecules28010453), 2023-01-03
Supplement: s1 [file s1]

# SUPPLEMENTARY INFORMATION

for

## A new approach to the synthesis of nanocrystalline cobalt boride in the course of the thermal reduction of cobalt complexes with boron cluster anions

Elena A. Malinina, Ivan I. Myshletsov, Grigorii A. Buzanov, Alexey S. Kubasov, Irina I. Kozerozhets, Lyudmila V. Goeva, Svetlana E. Nikiforova, Varvara V. Avdeeva, Konstantin Yu. Zhizhin, Nikolay T. Kuznetsov

**Table S1.** Crystal data and structure refinement for complex **1**.

|                                    |                                                                                 |
|------------------------------------|---------------------------------------------------------------------------------|
| Compound                           | <b>1</b>                                                                        |
| Empirical formula                  | C <sub>18</sub> H <sub>54</sub> B <sub>12</sub> CoN <sub>6</sub> O <sub>6</sub> |
| Formula weight                     | 639.32                                                                          |
| Temperature/K                      | 150.15                                                                          |
| Crystal system                     | triclinic                                                                       |
| Space group                        | P-1                                                                             |
| a/Å                                | 9.5857(5)                                                                       |
| b/Å                                | 18.9576(11)                                                                     |
| c/Å                                | 19.1748(11)                                                                     |
| α/°                                | 89.9010(10)                                                                     |
| β/°                                | 85.0580(10)                                                                     |
| γ/°                                | 89.9280(10)                                                                     |
| Volume/Å <sup>3</sup>              | 3471.5(3)                                                                       |
| Z                                  | 4                                                                               |
| ρ <sub>calc</sub> /cm <sup>3</sup> | 1.223                                                                           |
| μ/mm <sup>-1</sup>                 | 0.535                                                                           |
| F(000)                             | 1356.0                                                                          |
| Radiation                          | MoKα (λ = 0.71073)                                                              |
| Index ranges                       | -13 ≤ h ≤ 13<br>-25 ≤ k ≤ 25<br>-25 ≤ l ≤ 26                                    |
| Reflections collected              | 38452                                                                           |
| Independent reflections            | 18096<br>[R <sub>int</sub> = 0.0531, R <sub>sigma</sub> = 0.0906]               |
| Data/restraints/parameters         | 18096/0/770                                                                     |
| Goodness-of-fit on F <sup>2</sup>  | 0.984                                                                           |
| Final R indexes [I ≥ 2σ (I)]       | R <sub>1</sub> = 0.0510, wR <sub>2</sub> = 0.1001                               |
| Final R indexes [all data]         | R <sub>1</sub> = 0.1092, wR <sub>2</sub> = 0.1201                               |

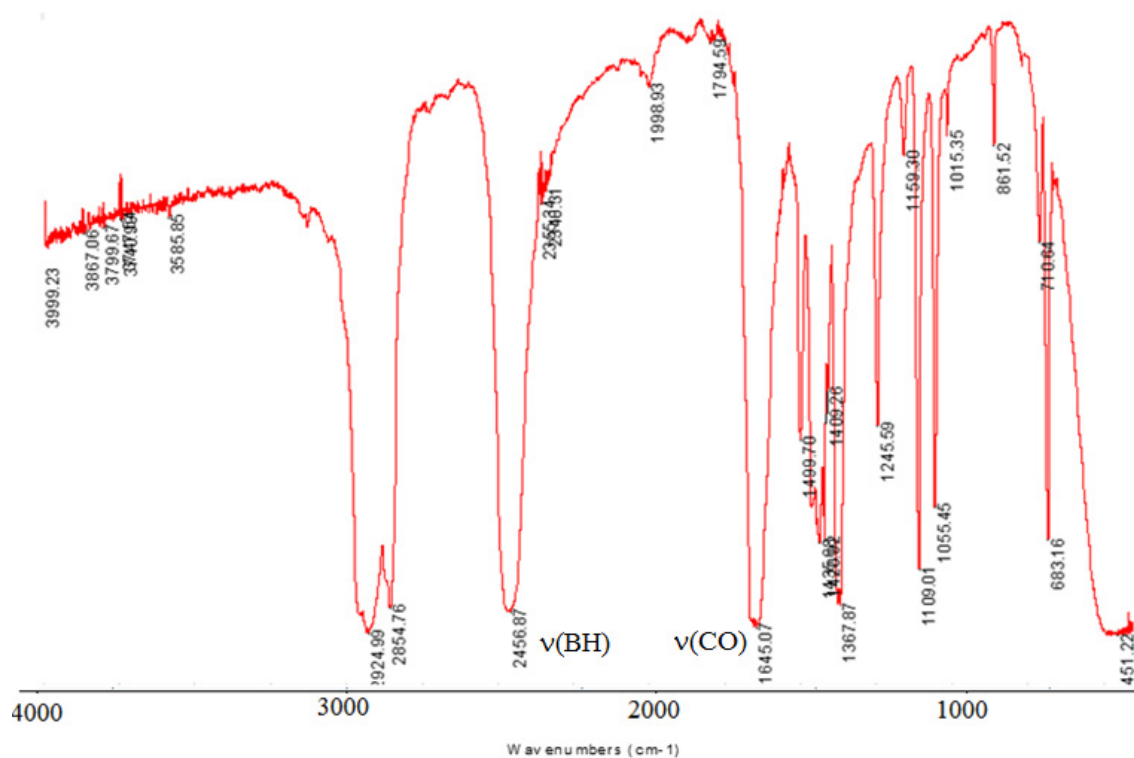

(a)

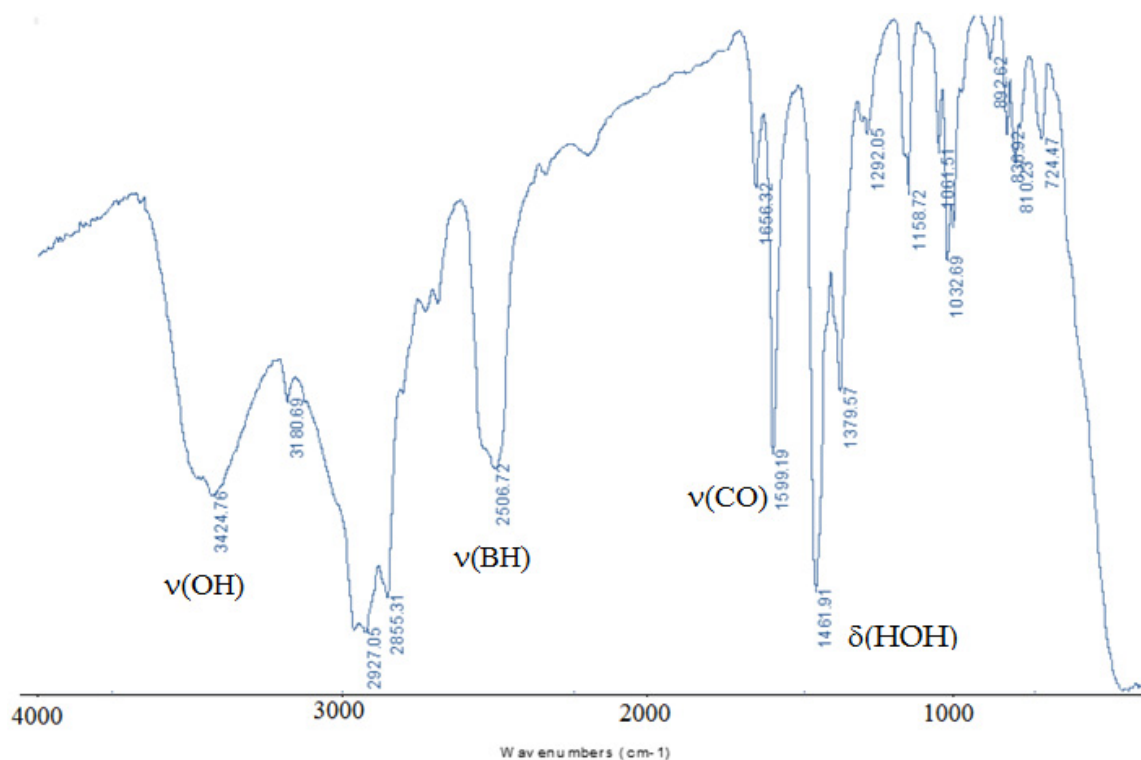

(b)

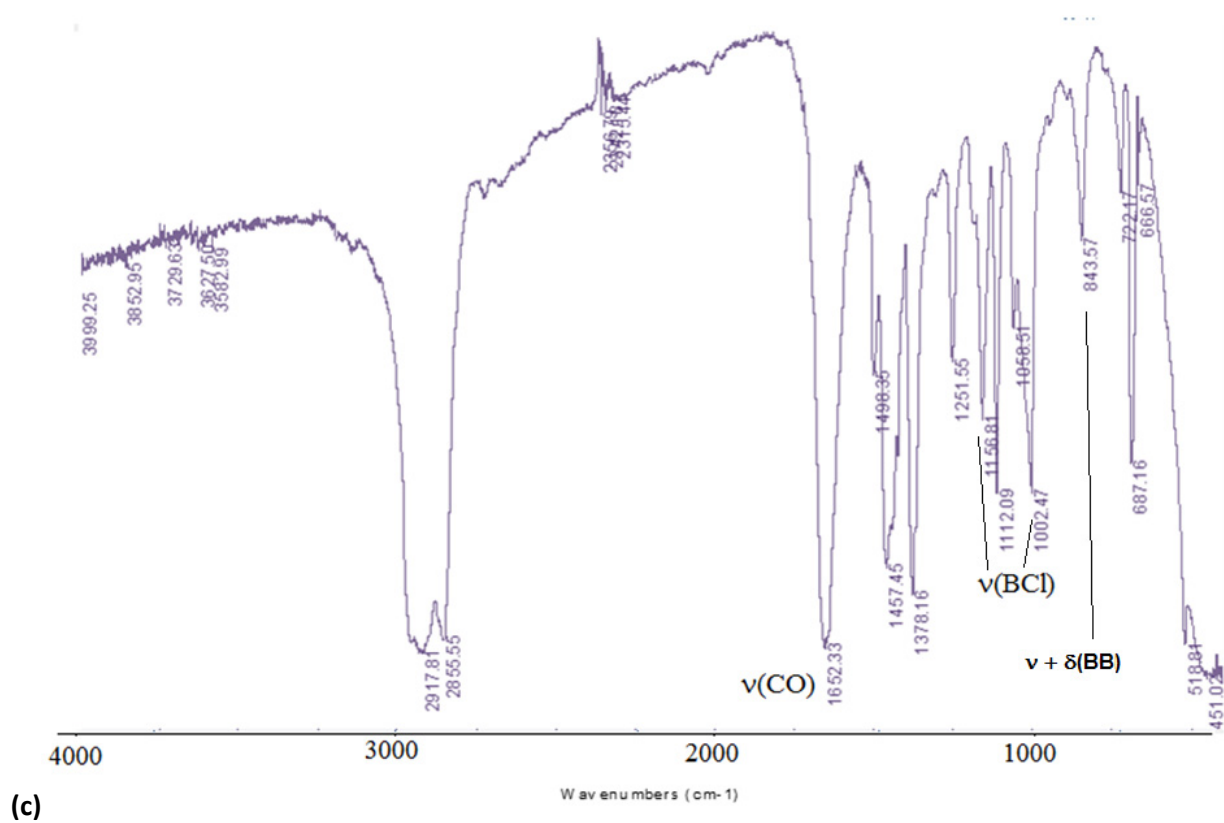

**Figure S1.** IR spectra of compounds (a) **1**, (b) **2**·3H<sub>2</sub>O, and (c) **3**.

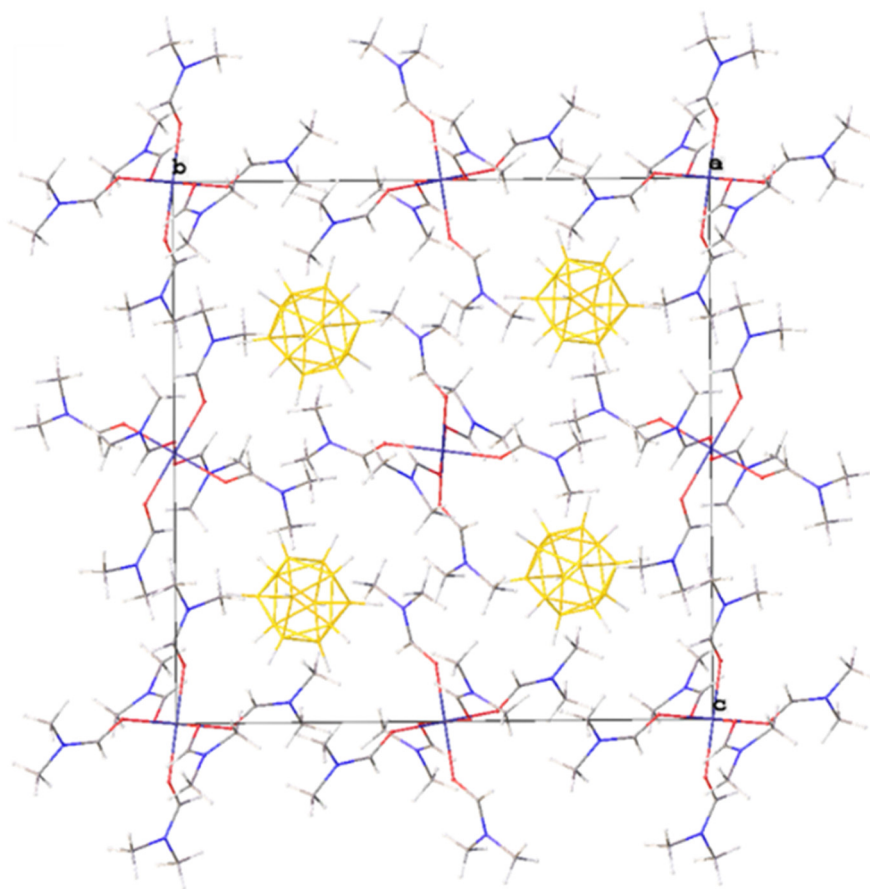

**Figure S2.** Projection of structure of complex **1** along the *a* axis.

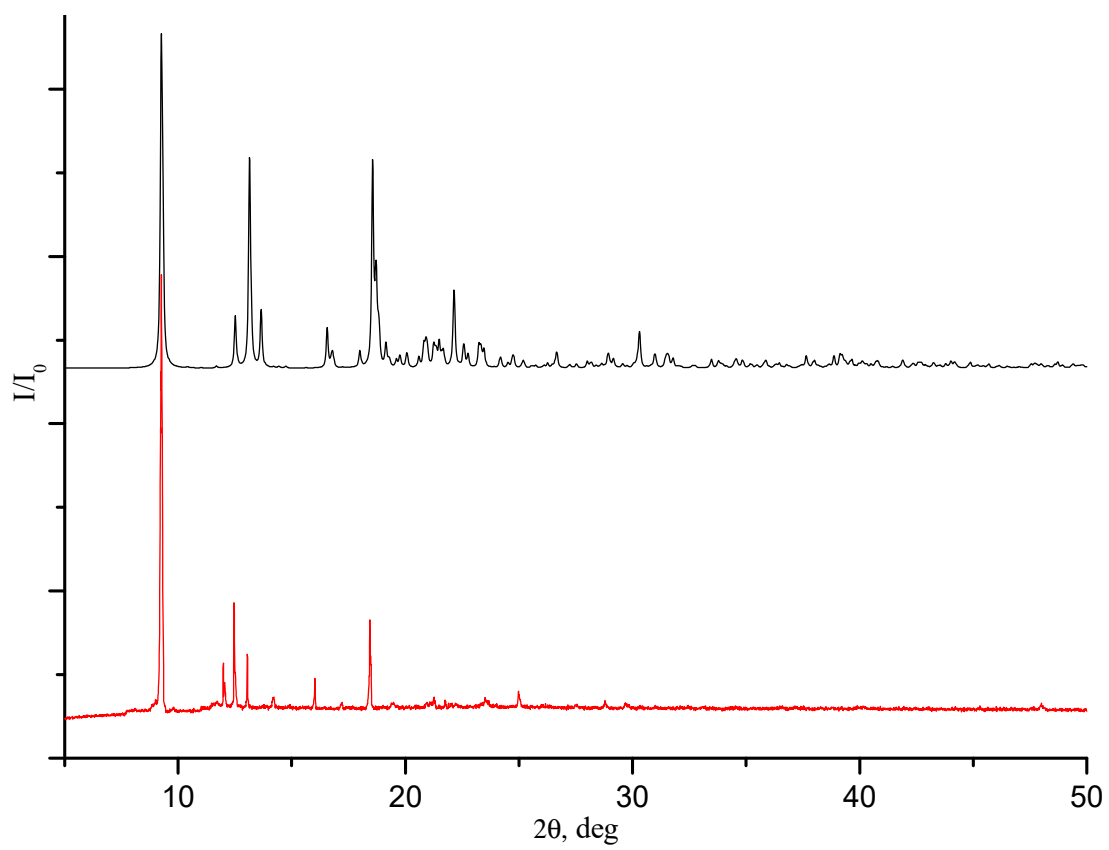

(a)

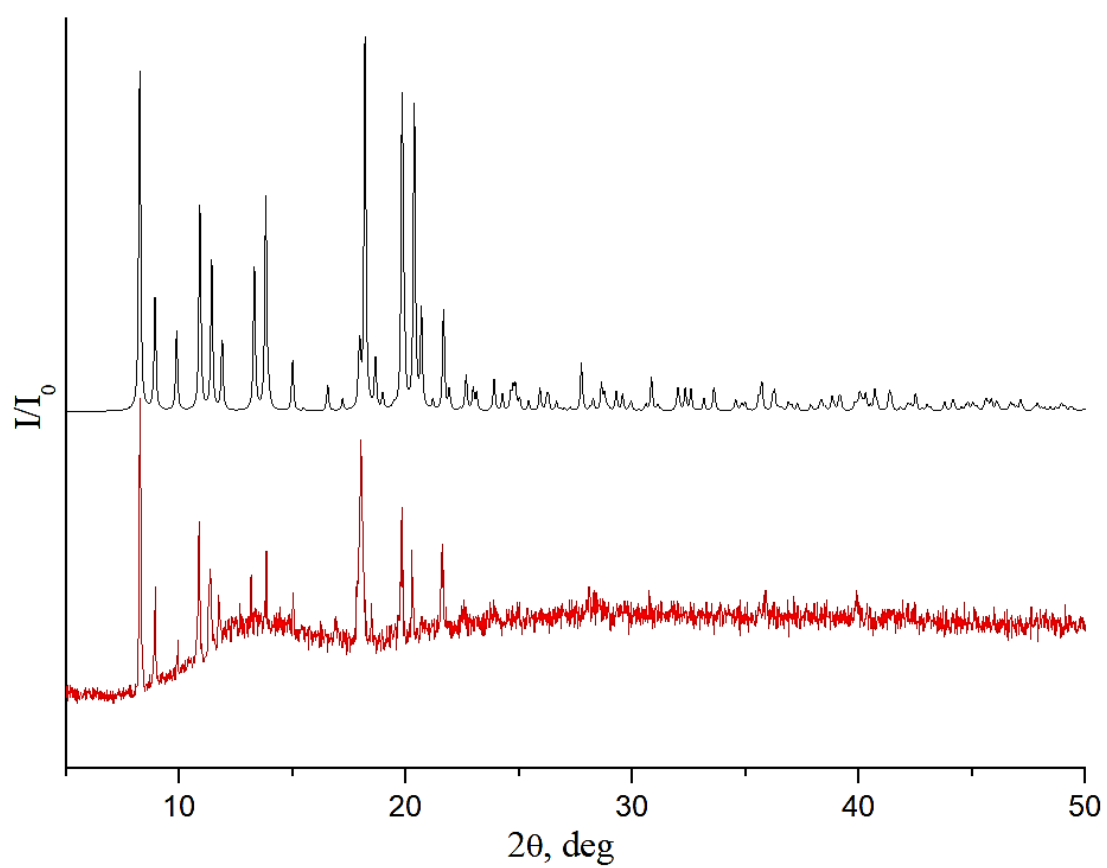

(b)

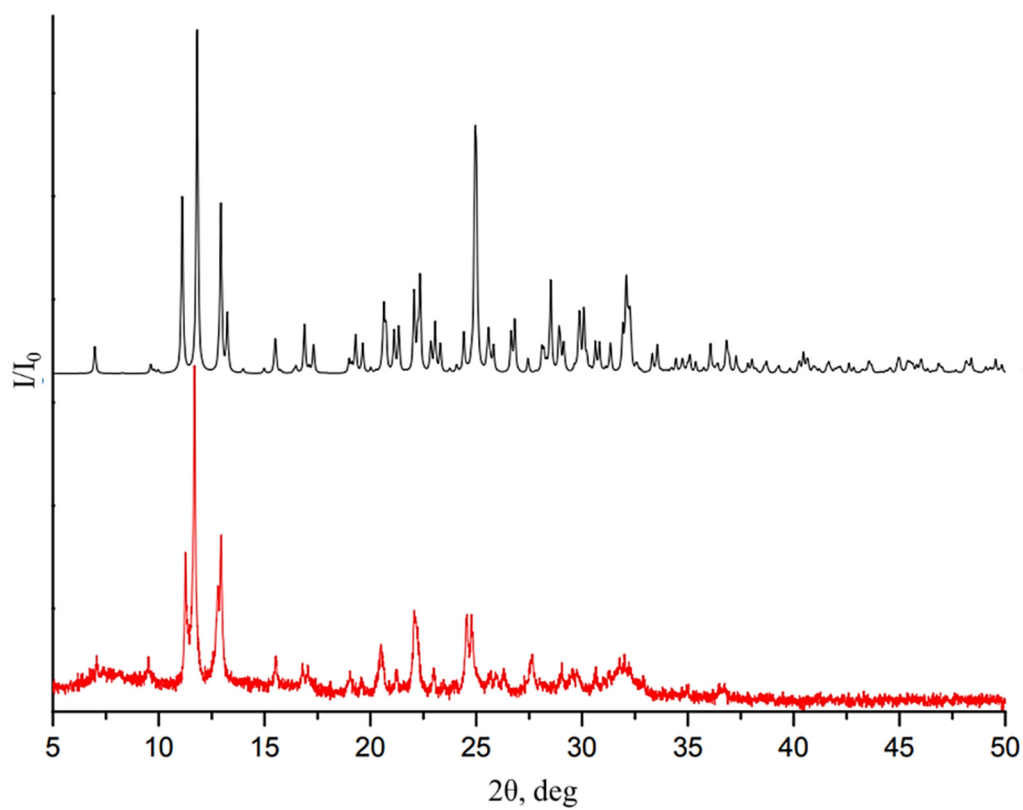

(c)

**Figure S3.** Calculated (black) and experimental (red) X-ray powder diffraction patterns for (a) compound 1, (b) compound 2, and (c) compound 3.

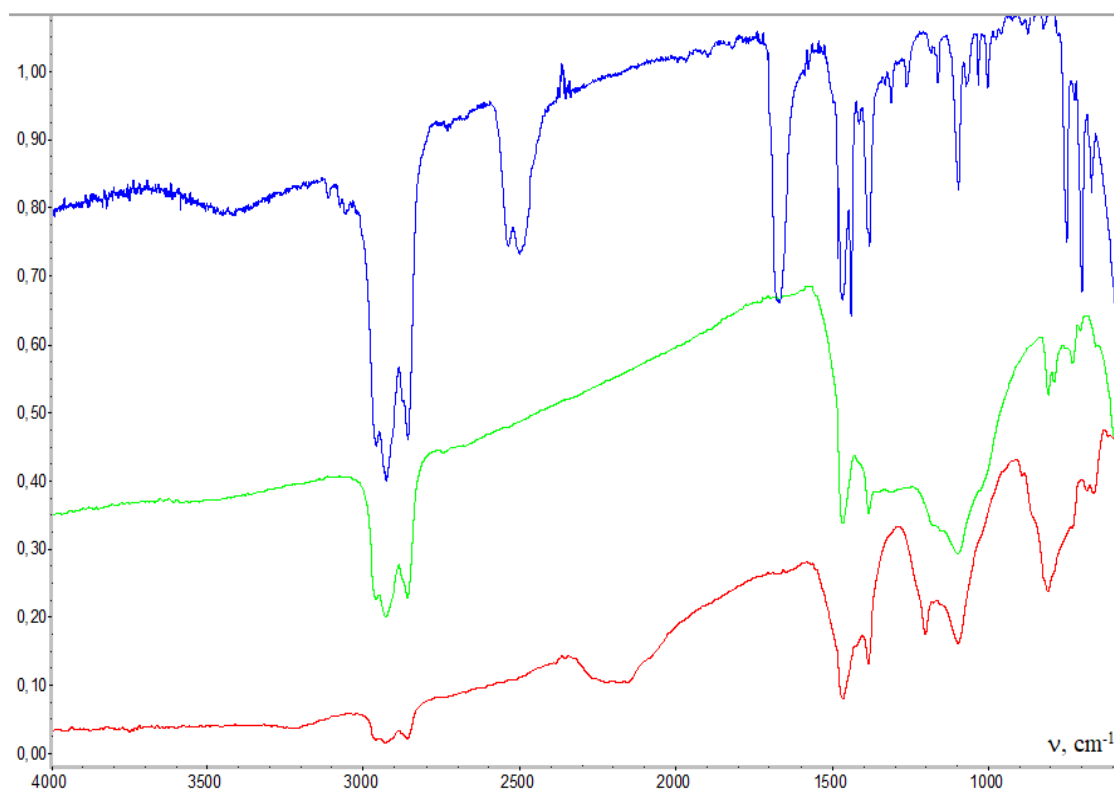

**Figure S4.** IR spectra of complex  $2 \cdot n\text{H}_2\text{O}$  (blue), sample 2a (green) and amorphous boron (red).

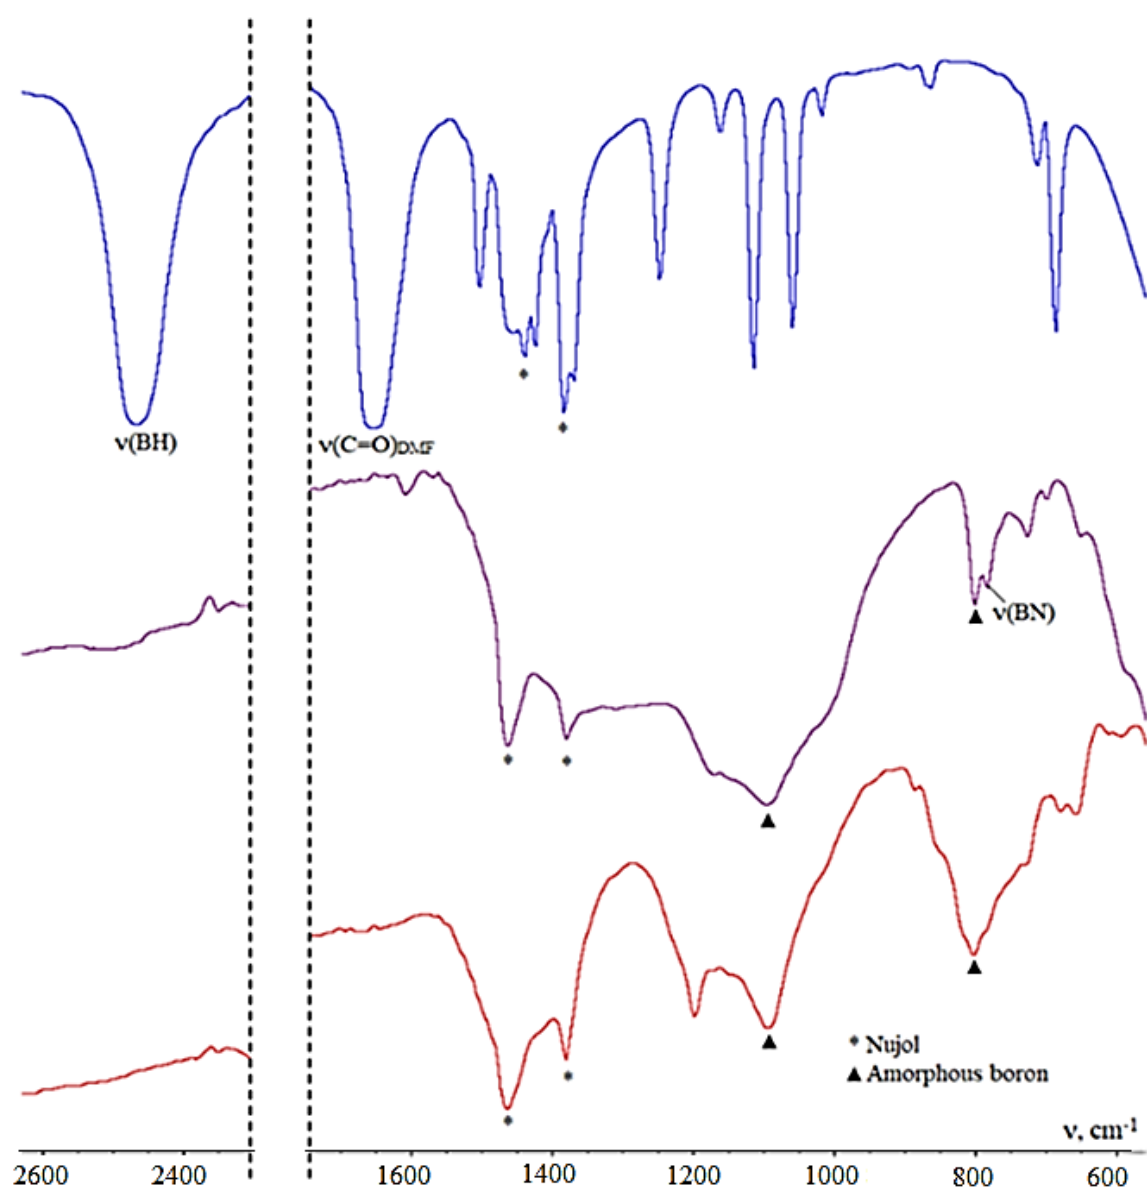

**Figure S5.** Fragments of IR spectra of complex **1** (blue), sample **1a** (purple) and amorphous boron (red).

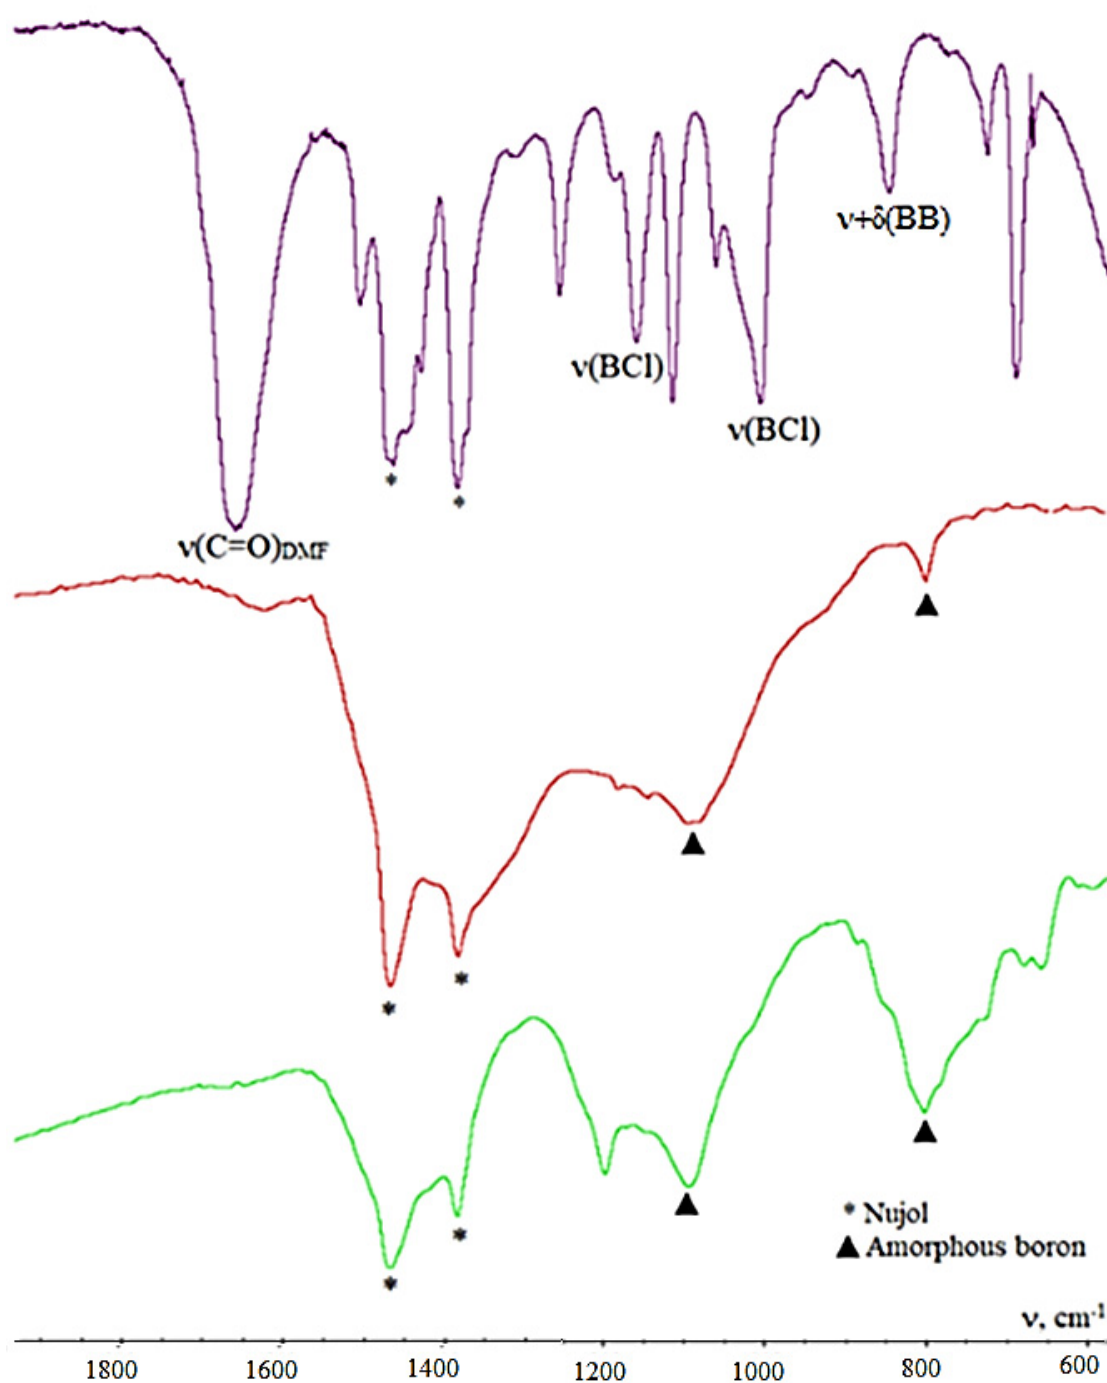

**Figure S6.** Fragments of IR spectra of complex **3** (purple), sample **3a** (red) and amorphous boron (green).



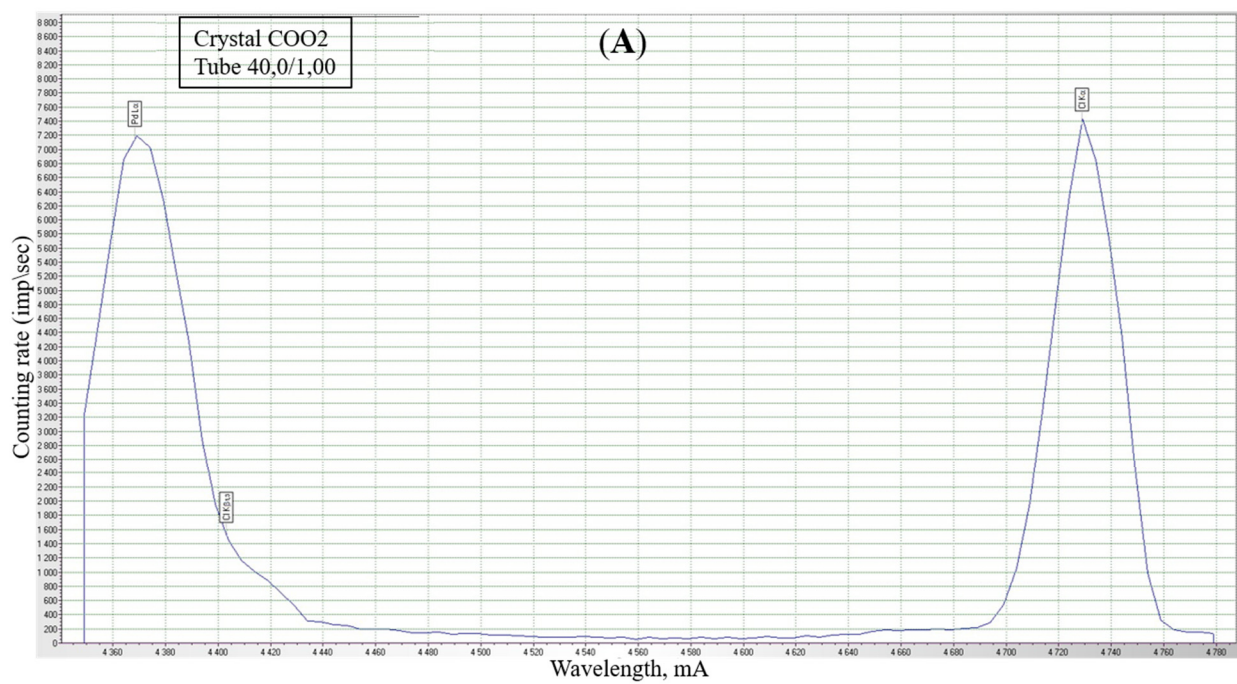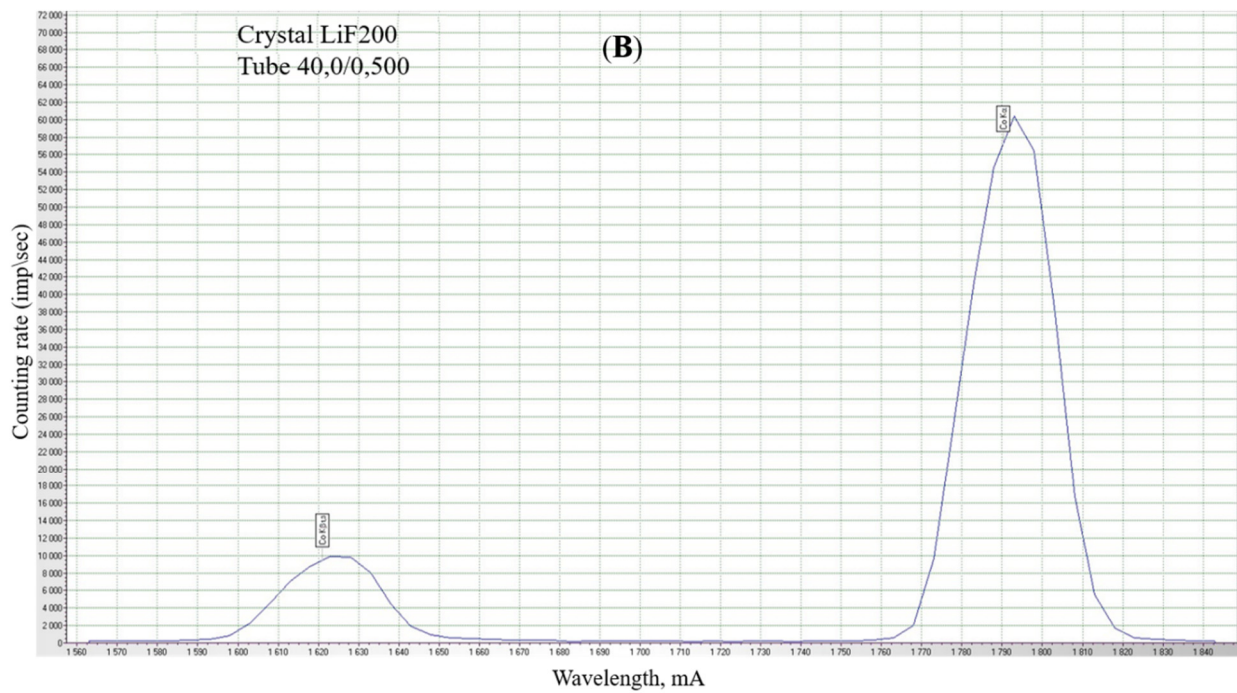

**Figure S7.** X-ray spectral fluorescence spectrum of sample **3a**: (A) determination of Cl, (B) determination of Co.
